# Supplementary material for: Genome-scale study of the importance of binding site context for transcription factor binding and gene regulation
Source: Springer Nature journal article supplement (doi:10.1186/1471-2105-9-484), 2008-11-17

**A**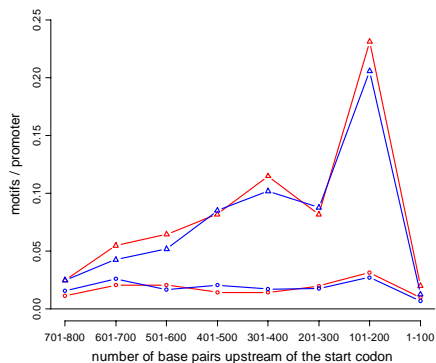**B**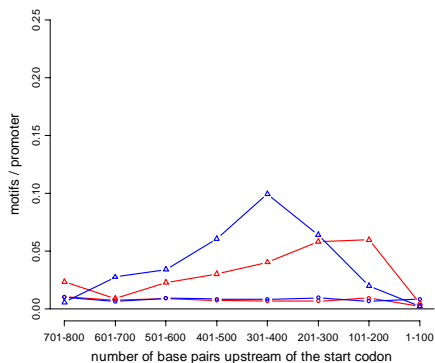**C**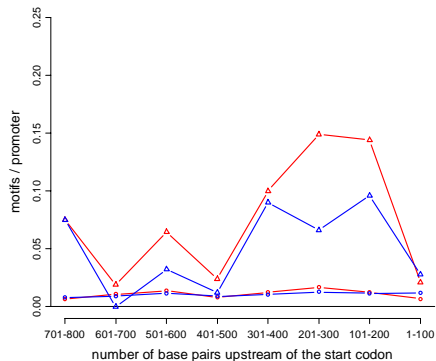**D**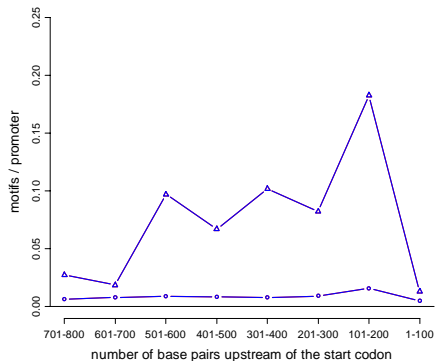**E**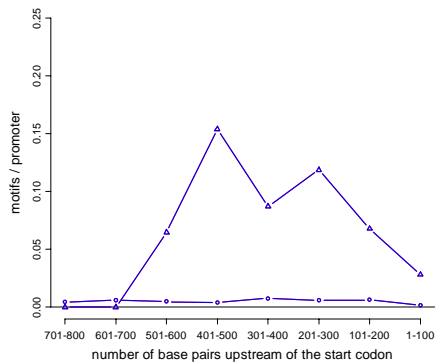

Supplement: 12859_2008_2469_MOESM4_ESM.pdf [file 12859_2008_2469_MOESM4_ESM.pdf]
